# Supplementary material
Source: PubMed Central journal article supplement (PMC2681718)
Supplement: supp_75_9_2831__1.pdf [file supp_75_9_2831__1.pdf]

## Supplementary material

**TABLE S1.** Fluorescence signal strength at different formamide

concentrations obtained in double hybridizations with oligonucleotide probes

ELM1034 (specifically designed for strain Pei191<sup>T</sup>; Cy3-labeled) and

EUB338 (detecting most bacteria; fluorescein-labeled).<sup>a</sup>

| Formamide<br>(%) | Strain Pei191 <sup>T</sup> |        | <i>Desulfurella acetivorans</i> |        |
|------------------|----------------------------|--------|---------------------------------|--------|
|                  | ELM1034                    | EUB338 | ELM1034                         | EUB338 |
| 0                | +++                        | +      | –                               | ++     |
| 10               | +++                        | +      | –                               | ++     |
| 20               | +++                        | +      | –                               | ++     |
| 30 <sup>b</sup>  | +++                        | +      | –                               | ++     |
| 40               | ++                         | W      | –                               | ++     |
| 50               | –                          | –      | –                               | ++     |

<sup>a</sup> Symbols indicate fluorescence signal strength in decreasing order: +++, ++, +, w (weak), – (absent).

<sup>b</sup> Optimal formamide concentration used for purity control (see text).

**TABLE S2.** Whole-cell fatty acid composition of strain Pei191<sup>T</sup>.

| Fatty acid            | Abundance (%) |
|-----------------------|---------------|
| C15:0 <i>iso</i>      | 25.3          |
| C15:0 <i>anteiso</i>  | 16.3          |
| C16:0 <i>iso</i>      | 12.1          |
| C17:0 <i>iso</i>      | 8.0           |
| C17:0 <i>anteiso</i>  | 7.3           |
| C14:0 <i>iso</i>      | 6.1           |
| C17:0 <i>iso</i> 3-OH | 4.9           |
| C16:0 <i>iso</i> 3-OH | 3.3           |
| C13:0 <i>iso</i>      | 2.9           |
| C14:0 <i>iso</i> 3-OH | 2.3           |
| C16:0                 | 2.1           |
| C13:0 <i>anteiso</i>  | 1.7           |
| C15:0 <i>iso</i> 3-OH | 1.6           |
| C17:0 2-OH            | 1.3           |

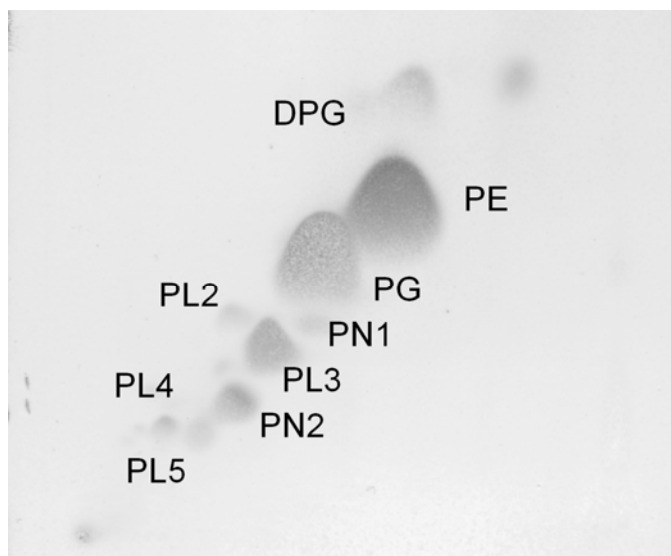

**FIG. S1.** Polar lipid analysis of strain Pei191<sup>T</sup> by two-dimensional thin-layer chromatography. DPG, diphosphatidylglycerol; PG, phosphatidylglycerol; PE, phosphatidylethanolamine; PN1, PN2, unidentified amino-phospholipids; PL1, PL2, PL3, PL4, PL5, unidentified phospholipids. The first dimension was developed in chloroform/methanol/water (65:25:4, by vol.) and the second dimension in chloroform/methanol/acetic acid/water (80:12:15:4, by vol.).
